# Supplementary material
Source: publisher site journal article supplement (https://www.dovepress.com/article/605216)
Supplement: Supplementary file 1 [file 605216%20Revised%20Supplementary_Material_.docx]

Supplementary Materials

Manuscript: Multidisciplinary Stakeholder Perspectives on the Design Needs of a Smart Walker for Fall Prevention Among Older Adults: A Qualitative Study in West Java, Indonesia

Submission ID: 605216

Authors: Dharmansyah D, Rahayuwati L, Pramukti I, Mutyara K.

List of supplementary items (cited in the main text in numerical order):

- • Supplementary Material 1. COREQ (Consolidated Criteria for Reporting Qualitative Research) 32-item checklist — cited in the Methods section (Study Design).
- • Supplementary Material 2. Semi-structured interview guide (English translation of the Indonesian/Sundanese guide used in the field).
- • Supplementary Table S1. Coding tree showing progression from codes to subthemes to themes, by stakeholder group.

# Supplementary Material 1. COREQ 32-Item Checklist

Domain 1: Research team and reflexivity

1. Interviewer/facilitator: DD (male, doctoral nursing researcher) conducted all interviews.

2. Credentials: DD: RN, MNS, PhD candidate. LR, IP: PhD, experienced qualitative researchers. KM: MD, MPH, PhD.

3. Occupation: Academic researchers; DD also clinical nurse educator.

4. Gender: DD male; LR, IP, KM female.

5. Experience/training: All team members had formal qualitative-research training; DD had prior fieldwork in geriatric settings.

6. Relationship established: No prior relationship with participants; introductions made at recruitment.

7. Participant knowledge of interviewer: Participants informed of researcher role, institution, and study purpose.

8. Interviewer characteristics: Reflexive memos maintained; assumptions disclosed in Methods (Reflexivity).

Domain 2: Study design

9. Methodological orientation: Qualitative description; Braun & Clarke reflexive thematic analysis.

10. Sampling: Purposive sampling with maximum variation.

11. Method of approach: Face-to-face invitation at care facilities and clinic; written information sheet provided.

12. Sample size: n = 13 (5 older adults, 5 caregivers, 3 healthcare professionals).

13. Non-participation: Two older adults declined due to fatigue; reasons documented.

14. Setting of data collection: Private rooms at Panti Sosial Budi Pertiwi, Pondok Lansia Tulus Kasih, and RS Al-Islam Bandung.

15. Presence of non-participants: Only interviewer and field-note taker present.

16. Description of sample: See Table 1 of main manuscript.

17. Interview guide: Pilot-tested with one participant per stakeholder group; see Supplementary Material 2.

18. Repeat interviews: Not conducted; member-checking visits used instead.

19. Audio/visual recording: All interviews audio-recorded with consent.

20. Field notes: Written during and after each interview by second team member.

21. Duration: 15–45 minutes per interview.

22. Data saturation: Data sufficiency assessed per RTA; frequency-based saturation not the organizing construct (see Methods).

23. Transcripts returned: Thematic summaries returned to three participants (one per group); full transcripts not returned at participants’ preference.

Domain 3: Analysis and findings

24. Number of data coders: Two (DD and LR) coded independently; reconciled through discussion.

25. Description of coding tree: See Supplementary Table S1.

26. Derivation of themes: Themes derived inductively from the data.

27. Software: NVivo 14 (Lumivero) used for data management; manual analytic memos.

28. Participant checking: Yes — thematic summaries confirmed accurate by three participants.

29. Quotations presented: Verbatim quotations in Indonesian/Sundanese with English translation; participant codes (R, C, D, P) provided.

30. Data and findings consistent: Themes directly supported by extracts shown in Results.

31. Clarity of major themes: See Results, Part A–C; synthesis in Part D.

32. Clarity of minor themes: Divergent views reported in Part D (Cross-Stakeholder Synthesis).

# Supplementary Material 2. Semi-Structured Interview Guide

The interview guide below was administered in Bahasa Indonesia or Sundanese, according to participant preference. English translation shown.

## A. Older Adult Walker Users

1. 1. Could you tell me about your experience using a walker in daily life?
2. 2. In what situations does the walker help you most? In what situations is it difficult?
3. 3. How do you feel emotionally about using the walker?
4. 4. What features would you want in an improved walker?
5. 5. What do you think about a walker that could warn you before a fall?
6. 6. What price would you consider affordable?

## B. Caregivers

1. 1. How has the walker affected the daily care you provide?
2. 2. What training did you and the older adult receive?
3. 3. What safety concerns do you still have?
4. 4. What additional features would help your caregiving work?
5. 5. What price point would be acceptable to families?

## C. Healthcare Professionals

1. 1. In your clinical practice, what are the main indications for prescribing a walker?
2. 2. What barriers do patients face in adopting walkers?
3. 3. What role could sensor-based technology play in fall prevention?
4. 4. How would a smart walker need to integrate with SOPs and BPJS coverage?
5. 5. What training infrastructure would be needed?

# Supplementary Table S1. Coding Tree (Codes → Subthemes → Themes)

| Stakeholder group | Illustrative codes | Subthemes | Final theme |
| --- | --- | --- | --- |
| Older adults | fear of falling; safety anchor; confidence | safety; confidence | Walker as safety anchor |
| Older adults | bathroom; tight space; jamban; narrow corridor | architectural constraints | Environmental and postural challenges |
| Older adults | alarm; durability; foldable; no wheels | design features | Desired design features |
| Caregivers | lifting; wheelchair replacement; less fatigue | physical burden | Reduced caregiver physical burden |
| Caregivers | sequencing; training; teaching | education | Critical role of education and training |
| Caregivers | camera; notification; affordability Rp 500,000 | technology expectations | Expectations for technologically enhanced walkers |
| Healthcare professionals | BPJS; retiree; affordability | economic constraint | Affordability and BPJS insurance constraints |
| Healthcare professionals | SOP; algorithm; specialist referral | regulatory integration | Regulatory integration and training infrastructure |
| Healthcare professionals | passive sensing; no buttons; simplicity | simplicity | Sensor technology as early warning – with simplicity requirements |
